# Supplementary material
Source: PubMed Central journal article supplement (PMC3993591)
Supplement: TMCB_A_12275185_SM0001.pdf [file TMCB_A_12275185_SM0001.pdf]

Supplementary Material for

**A *Saccharomyces cerevisiae* Ribonuclease H2 interaction network functions to suppress genome instability**

By

Stephanie Allen-Soltero, Sandra L. Martinez, Christopher D. Putnam  
and Richard D. Kolodner

**Supplementary Figures.**

**Figure S1. Analysis of growth phenotypes caused by RNase H2 defects in combination with different DNA metabolism defects.** Cultures were diluted to either  $1 \times 10^6$  cells/mL or  $1 \times 10^5$  cells/mL and then 2  $\mu$ l from ten-fold serial dilutions were spotted in each row. Strains were spotted onto each plate as follows: top row - wild-type, second row - the *rnh203* $\Delta$  single mutant, third row - the query single mutant (*mutX* $\Delta$ ), fourth through sixth rows - independent isolates of the double mutant.

**Figure S2. RNase H2 defects do not affect growth of some DNA metabolism mutants.** Cultures were diluted to either  $1 \times 10^6$  cells/mL or  $1 \times 10^5$  cells/mL and then 2  $\mu$ l from ten-fold serial dilutions were spotted in each row. Strains were spotted onto each plate as follows: top row - wild-type, second row - the *rnh203* $\Delta$  single mutant, third row - the query single mutant (*mutX* $\Delta$ ), fourth through sixth rows - independent isolates of the double mutant.

**Figure S3. RNase H2 defects in combination with some DNA metabolism defects can cause the accumulation of cells with an aberrant morphology phenotype.** The budding index was measured to determine percentage of cells in each phase of the cell cycle and percentage of cells with an aberrant morphology phenotype. Data for the indicated mutant strains are presented as histograms with error bars indicating the standard deviation.

**Figure S4. RNaseH2 defects do not cause an aberrant morphology phenotype in combination with some DNA metabolism defects.** The budding index was measured to determine percentage of cells in each phase of the cell cycle and percentage of cells with an aberrant morphology phenotype. Data for the indicated mutant strains are presented as histograms with error bars indicating the standard deviation.

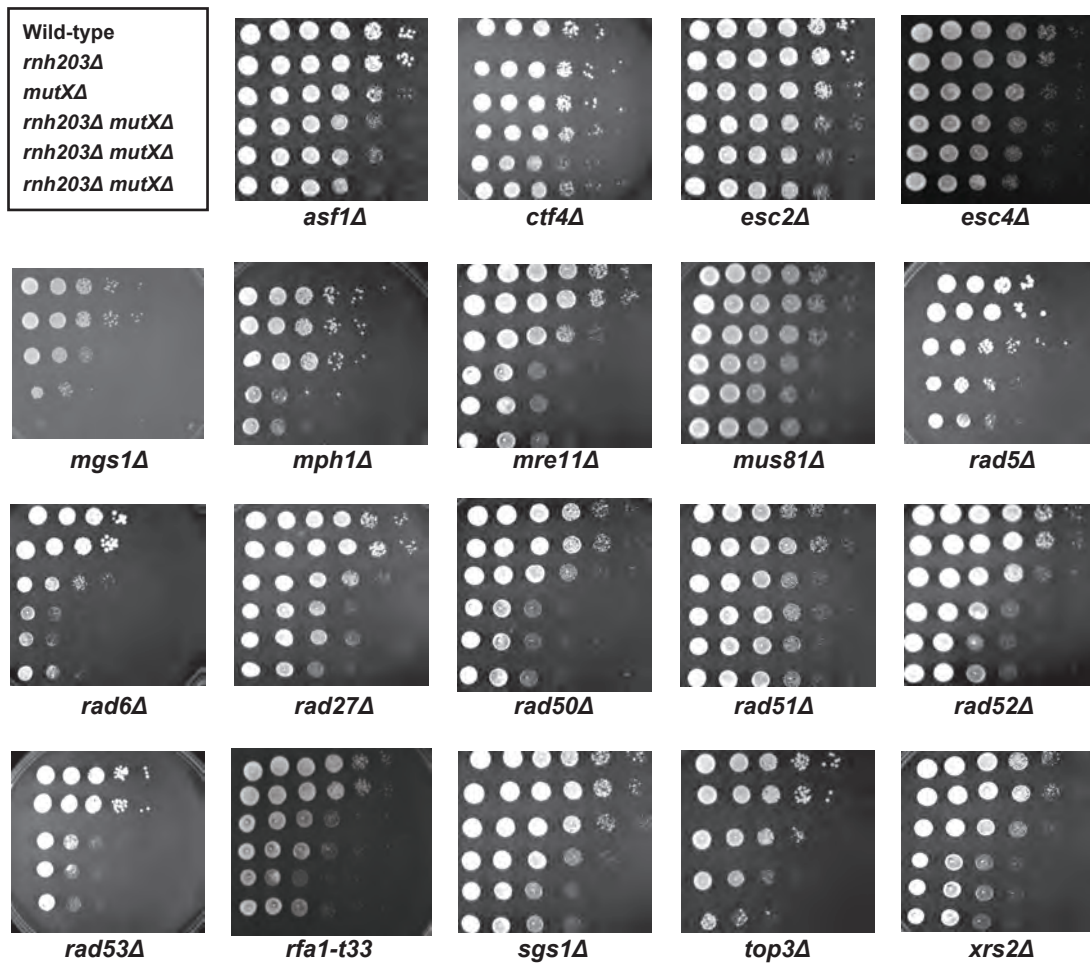

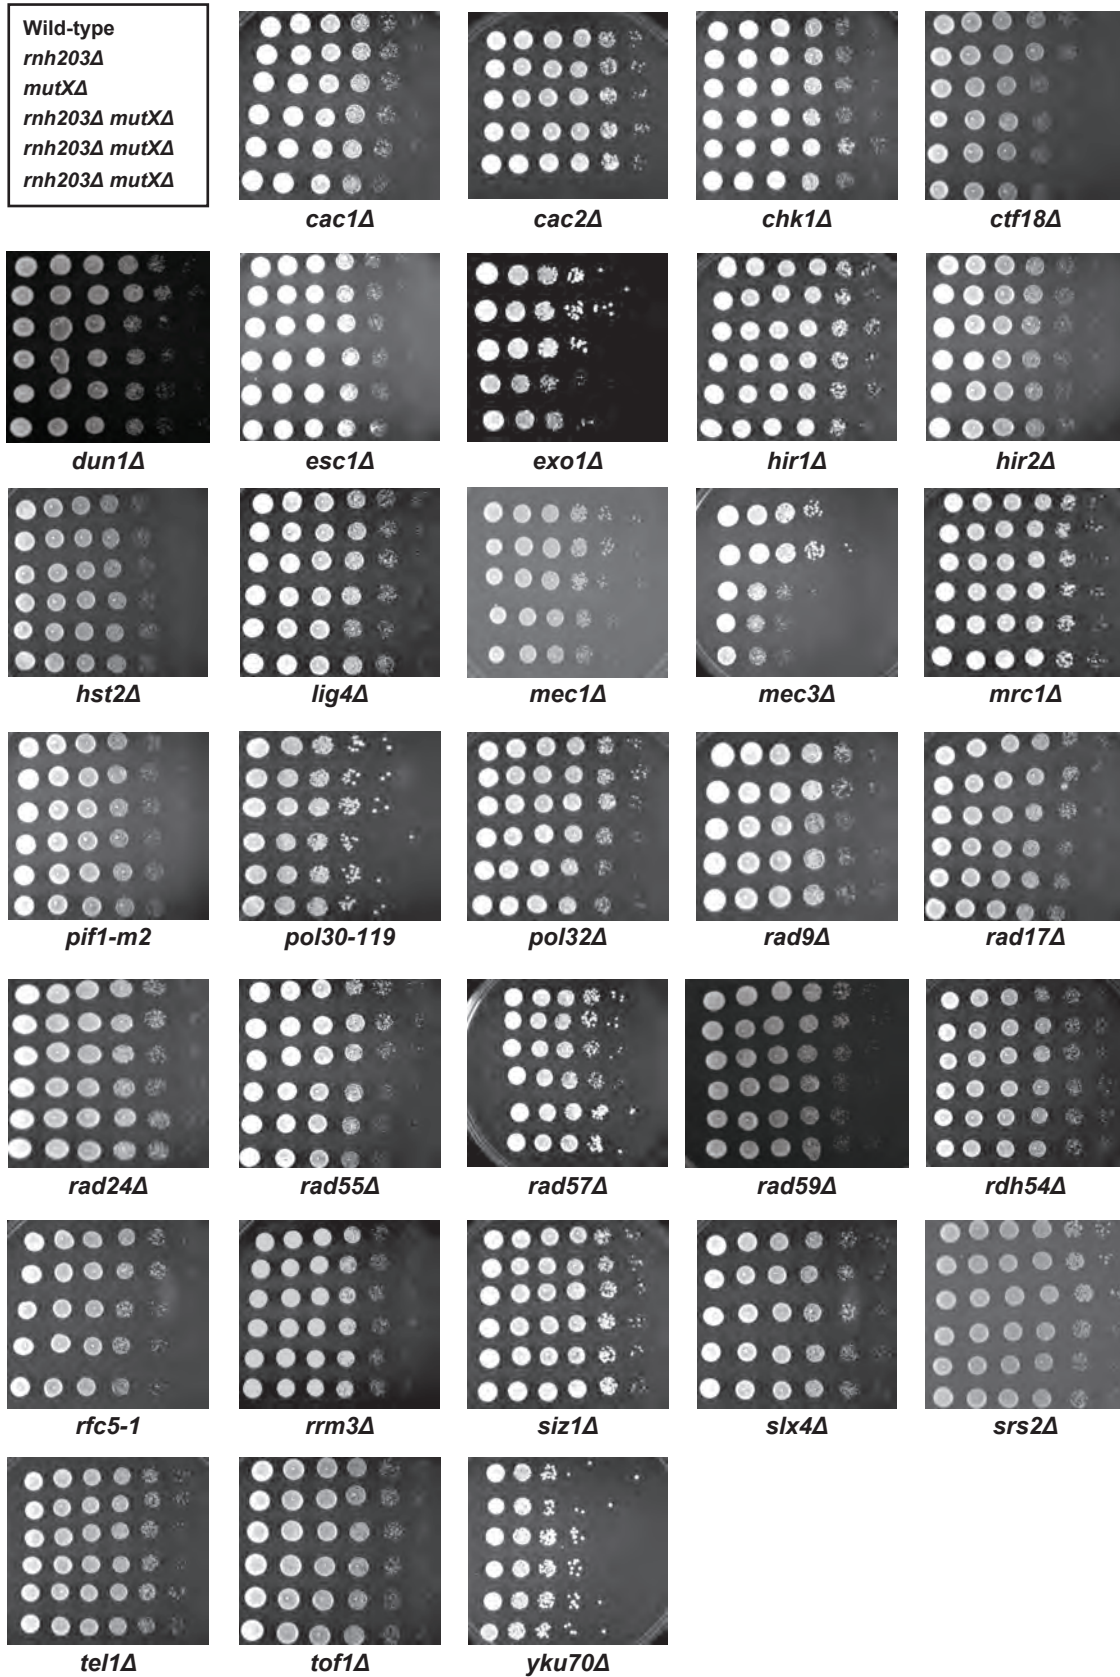



Supplemental Figure 3.

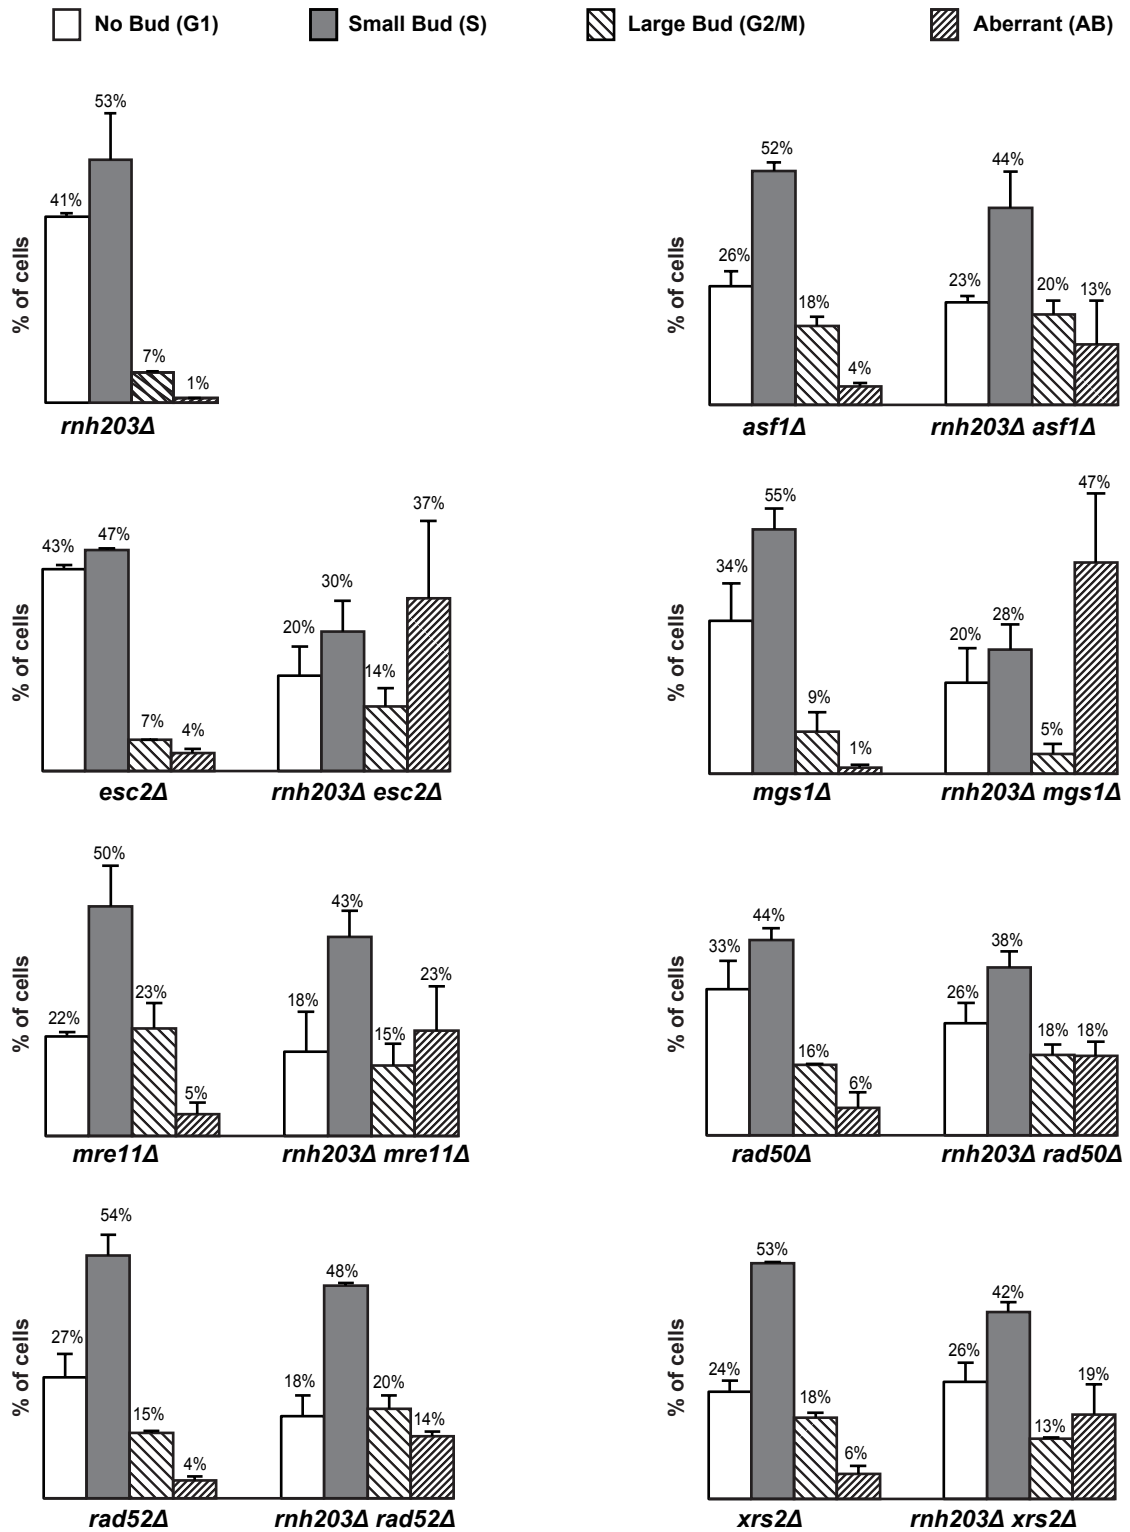

Supplemental Figure 4.

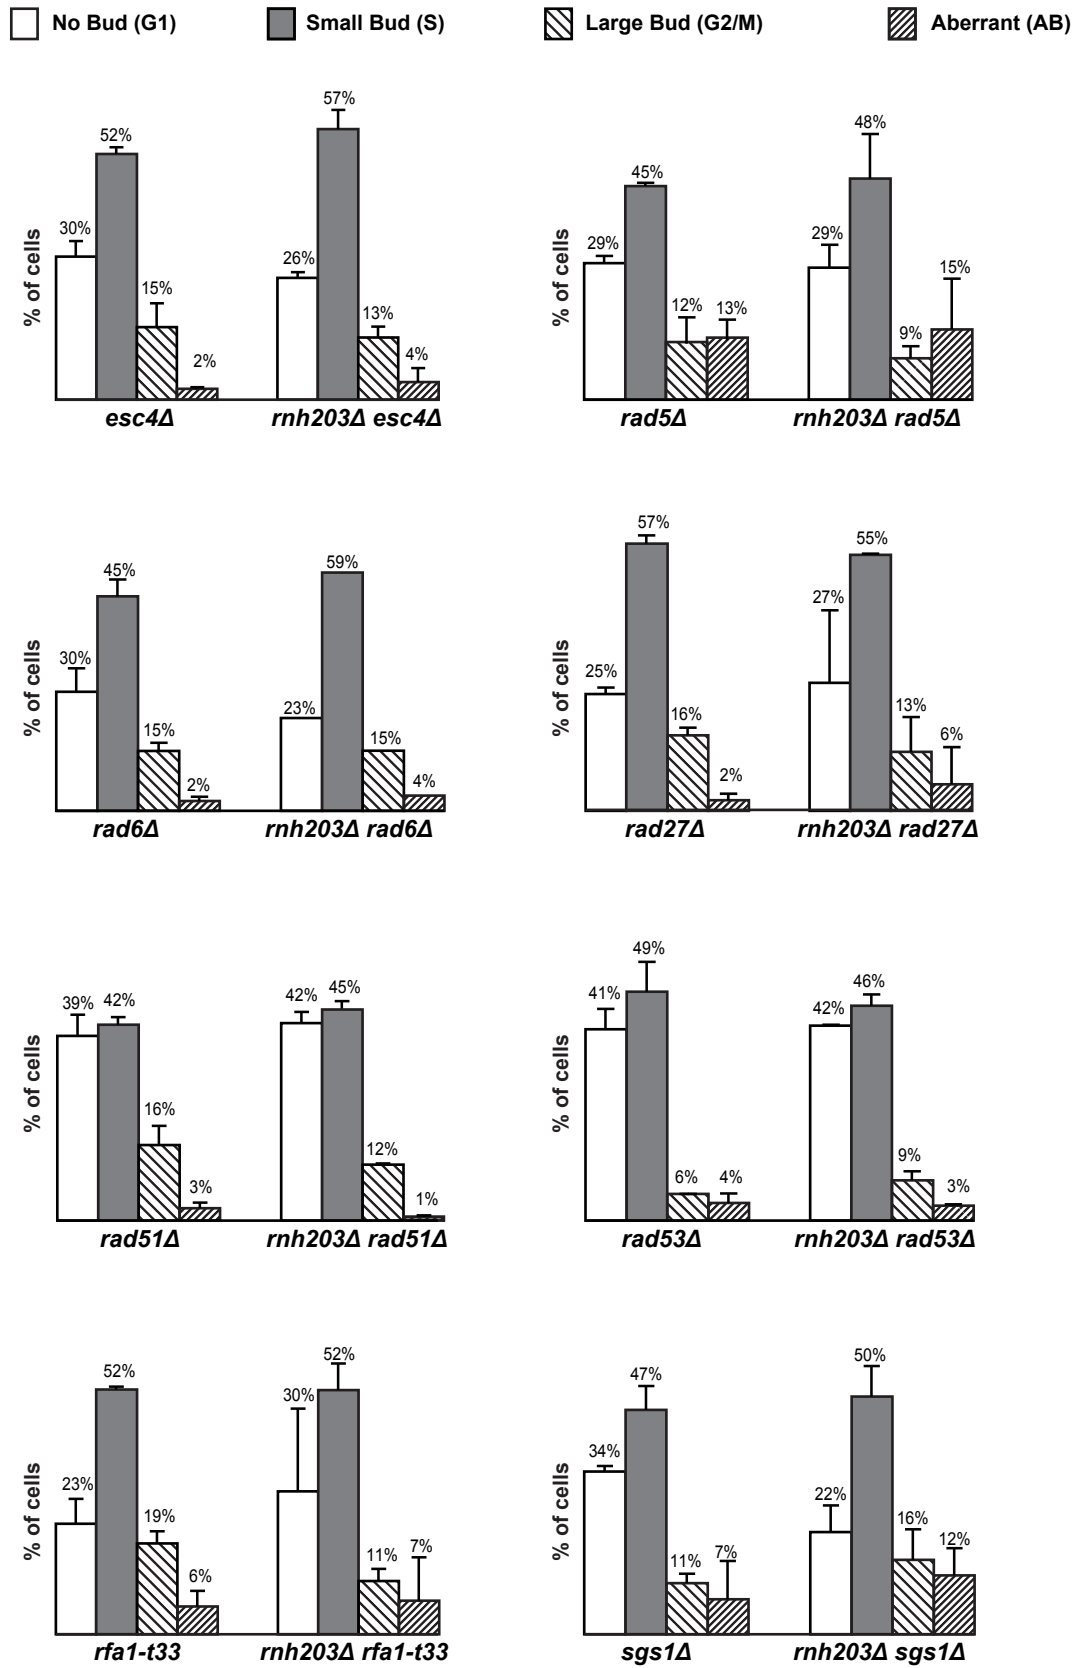

Table S1. Effect of RNase H2 defects on mutation rates.

| <b>Genotype<br/>(RDKY #)</b> | <b><i>Can'</i></b>                        | <b><i>hom3-10</i></b>                      | <b><i>lys2ΔBgl</i></b>                    | <b><i>GCR</i></b>                           |
|------------------------------|-------------------------------------------|--------------------------------------------|-------------------------------------------|---------------------------------------------|
| Wild-type<br>(7239)          | 6.0 [0.7-12.5] × 10 <sup>-7</sup><br>(1)  | 1.9 [1.4-40.1] × 10 <sup>-9</sup><br>(1)   | 6.8 [1.7-25.5] × 10 <sup>-9</sup><br>(1)  | 3.6 [1.9-14.0] × 10 <sup>-10</sup><br>(1)   |
| <i>rnh201Δ</i><br>(7235)     | 3.6 [2.2-9.8] × 10 <sup>-7</sup><br>(0.6) | 4.3 [2.9-6.3] × 10 <sup>-9</sup><br>(2.3)  | 1.1 [0.6-2.3] × 10 <sup>-8</sup><br>(1.6) | 4.7 [2.4-14.0] × 10 <sup>-10</sup><br>(1.3) |
| <i>rnh202Δ</i><br>(7237)     | 3.7 [2.4-5.6] × 10 <sup>-7</sup><br>(0.6) | 5.7 [3.6-8.8] × 10 <sup>-9</sup><br>(3.0)  | 1.1 [0.7-1.9] × 10 <sup>-8</sup><br>(1.6) | 3.3 [2.2-7.1] × 10 <sup>-10</sup><br>(0.9)  |
| <i>rnh203Δ</i><br>(7209)     | 3.2 [2.2-3.9] × 10 <sup>-7</sup><br>(0.5) | 7.5 [2.9-10.6] × 10 <sup>-9</sup><br>(3.9) | 1.0 [0.7-1.5] × 10 <sup>-8</sup><br>(1.5) | 2.0 [0.0-8.9] × 10 <sup>-10</sup><br>(0.5)  |

All strains are isogenic to RDKY7239 (*MATα*, *ura3-52*, *leu2Δ1*, *trp1Δ63*, *his3Δ200*, *lys2ΔBgl*, *hom3-10*, *ade2::hisG*, *ade8*, *hxt13::URA3*). The numbers in parentheses ( ) are the fold increase relative to RDKY7239. Numbers in brackets [ ] represent the 95% confidence intervals.

Table S2. Mutation spectrum analysis of an *rnh203Δ* mutant strain.

| <b>Genotype</b> | <b>Mutation<sup>*</sup></b> | <b>Frequency<sup>†</sup></b> | <b>%</b> | <b>Rate</b>           |
|-----------------|-----------------------------|------------------------------|----------|-----------------------|
| Wild-type       | Single BS                   | 60/94                        | 63.8     | $35 \times 10^{-8}$   |
|                 | GC to TA                    | 19/94                        | 20.2     | $11 \times 10^{-8}$   |
|                 | GC to AT                    | 15/94                        | 16.0     | $8.8 \times 10^{-8}$  |
|                 | GC to CG                    | 15/94                        | 16.0     | $8.8 \times 10^{-8}$  |
|                 | AT to TA                    | 7/94                         | 7.4      | $4.1 \times 10^{-8}$  |
|                 | AT to CG                    | 2/94                         | 2.1      | $1.2 \times 10^{-8}$  |
|                 | AT to GC                    | 2/94                         | 2.1      | $1.2 \times 10^{-8}$  |
|                 | -1 Frameshift               | 15/94                        | 16.0     | $8.8 \times 10^{-8}$  |
|                 | +1 Frameshift               | 2/94                         | 2.1      | $1.2 \times 10^{-8}$  |
|                 | Double BS                   | 1/94                         | 1.1      | $0.6 \times 10^{-8}$  |
|                 | Double BD                   | 0/94                         | <1.1     | $<0.6 \times 10^{-8}$ |
|                 | Large Deletion              | 12/94                        | 10.6     | $5.8 \times 10^{-8}$  |
|                 | Large Insertion             | 0/94                         | <1.1     | $<0.6 \times 10^{-8}$ |
|                 | Complex                     | 4/94                         | 6.4      | $3.5 \times 10^{-8}$  |
|                 | <i>rnh203Δ</i>              | Single BS                    | 47/82    | 57.3                  |
| GC to TA        |                             | 12/82                        | 14.6     | $4.7 \times 10^{-8}$  |
| GC to AT        |                             | 6/82                         | 7.3      | $2.3 \times 10^{-8}$  |
| GC to CG        |                             | 14/82                        | 17.1     | $5.5 \times 10^{-8}$  |
| AT to TA        |                             | 6/82                         | 7.3      | $2.3 \times 10^{-8}$  |
| AT to CG        |                             | 6/82                         | 7.3      | $2.3 \times 10^{-8}$  |
| AT to GC        |                             | 3/82                         | 3.7      | $1.2 \times 10^{-8}$  |
| -1 Frameshift   |                             | 19/82                        | 23.2     | $7.4 \times 10^{-8}$  |
| +1 Frameshift   |                             | 3/82                         | 3.7      | $1.2 \times 10^{-8}$  |
| Double BS       |                             | 0/82                         | <1.2     | $<0.4 \times 10^{-8}$ |
| Double BD       |                             | 4/82                         | 4.9      | $1.6 \times 10^{-8}$  |
| Large Deletion  |                             | 3/82                         | 2.4      | $1.2 \times 10^{-8}$  |
| Large Insertion |                             | 2/82                         | 2.4      | $0.8 \times 10^{-8}$  |
| Complex         |                             | 4/82                         | 6.1      | $1.6 \times 10^{-8}$  |

\* BS, Base Substitution; BD, Base Deletion; Large Deletion or insertion, Deletions or insertions of greater than 2 bases; Complex, Multiple base substitution and/or frameshift mutations. All Double BD were found in short dinucleotide repeat sequences.

<sup>†</sup> The number of times each type of mutation occurred is listed under frequency.

Table S3. Effect of an RNase H2 mutation on the rate of accumulating GCRs.

| <b>Genotype</b>      | <b>RDKY #</b> | <b>Wild-type<br/>GCR Rate</b>            | <b>RDKY #</b> | <b><i>rnh203Δ</i><br/>GCR Rate</b>      |
|----------------------|---------------|------------------------------------------|---------------|-----------------------------------------|
| Wild-type            | 7239          | 3.6 [1.9-14.0] × 10 <sup>-10</sup> (1)   | 7209          | 2.0 [0.0-8.9] × 10 <sup>-10</sup> (0.5) |
| <i>dun1Δ</i>         | 7240          | 8.9 [3.1-62.0] × 10 <sup>-8</sup> (247)  | 7242          | 1.2 [0.9-3.0] × 10 <sup>-7</sup> (333)  |
| <i>hir1Δ</i>         | 7261          | 7.0 [5.0-40.1] × 10 <sup>-10</sup> (2)   | 7263          | 5.2 [4.5-7.9] × 10 <sup>-10</sup> (1)   |
| <i>mec1Δ</i>         | 7302          | 2.1 [0.8-5.8] × 10 <sup>-8</sup> (58)    | 7304          | 2.0 [0.1-8.3] × 10 <sup>-8</sup> (55)   |
| <i>mec3Δ</i>         | 7277          | < 2.4 [1.9-2.8] × 10 <sup>-9</sup> (6)   | 7304          | 5.7 [2.3-11.5] × 10 <sup>-9</sup> (15)  |
| <i>mgs1Δ</i>         | 7281          | < 5.3 [4.6-10.1] × 10 <sup>-10</sup> (1) | 7283          | < 1.1 [0.8-1.5] × 10 <sup>-9</sup> (3)  |
| <i>mph1Δ</i>         | 7286          | 1.1 [0.6-5.6] × 10 <sup>-9</sup> (3)     | 7288          | < 1.2 [1.1-2.8] × 10 <sup>-9</sup> (3)  |
| <i>mrc1Δ</i>         | 7298          | 4.3 [1.6-23.0] × 10 <sup>-9</sup> (12)   | 7300          | 2.1 [1.0-9.6] × 10 <sup>-9</sup> (6)    |
| <i>pif1-m2</i>       | 7314          | 3.1 [2.2-4.7] × 10 <sup>-8</sup> (86)    | 7312          | 2.6 [1.7-5.6] × 10 <sup>-8</sup> (72)   |
| <i>rad5Δ</i>         | 7336          | 2.4 [1.1-98.5] × 10 <sup>-9</sup> (7)    | 7338          | < 2.6 [1.8-9.9] × 10 <sup>-9</sup> (7)  |
| <i>rad17Δ</i>        | 7324          | 4.9 [3.2-10.2] × 10 <sup>-9</sup> (14)   | 7326          | 6.9 [4.8-24.8] × 10 <sup>-9</sup> (19)  |
| <i>rad27Δ</i>        | 7332          | 1.1 [0.7-2.0] × 10 <sup>-7</sup> (306)   | 7335          | 2.2 [0.7-3.1] × 10 <sup>-7</sup> (611)  |
| <i>rad51Δ</i>        | 7344          | 3.5 [1.5-7.9] × 10 <sup>-9</sup> (10)    | 7346          | 3.7 [1.8-21.6] × 10 <sup>-9</sup> (10)  |
| <i>rad51Δ rad59Δ</i> | 7497          | 1.2 [0.6-2.7] × 10 <sup>-8</sup> (33)    | 7499          | 1.6 [0.2-3.7] × 10 <sup>-8</sup> (44)   |
| <i>rad52Δ</i>        | 7348          | 6.0 [0.3-10.4] × 10 <sup>-8</sup> (167)  | 7350          | 7.1 [0.5-17.2] × 10 <sup>-8</sup> (197) |
| <i>rad53Δ</i>        | 7370          | 7.4 [3.7-10.2] × 10 <sup>-9</sup> (21)   | 7372          | 5.4 [2.4-8.2] × 10 <sup>-9</sup> (15)   |
| <i>rad55Δ</i>        | 7374          | 3.2 [1.5-16.5] × 10 <sup>-9</sup> (9)    | 7376          | 5.3 [3.3-16.7] × 10 <sup>-9</sup> (15)  |
| <i>rad59Δ</i>        | 7382          | 4.5 [1.7-27.0] × 10 <sup>-9</sup> (13)   | 7383          | 1.8 [0.3-3.5] × 10 <sup>-8</sup> (50)   |
| <i>rfa1-t33</i>      | 7397          | 1.2 [0.9-1.7] × 10 <sup>-7</sup> (325)   | 7399          | 8.6 [5.3-11.4] × 10 <sup>-8</sup> (239) |
| <i>rrm3Δ</i>         | 7410          | 1.4 [0.9-5.5] × 10 <sup>-9</sup> (4)     | 7412          | 2.2 [1.3-3.1] × 10 <sup>-9</sup> (6)    |
| <i>siz1Δ</i>         | 7418          | 1.9 [0.8-5.4] × 10 <sup>-9</sup> (5)     | 7420          | 4.7 [1.7-10.3] × 10 <sup>-9</sup> (13)  |
| <i>slx4Δ</i>         | 7426          | 1.8 [0.6-3.0] × 10 <sup>-8</sup> (37)    | 7428          | 1.8 [1.3-4.3] × 10 <sup>-8</sup> (38)   |
| <i>srs2Δ</i>         | 7430          | 6.1 [4.9-38.0] × 10 <sup>-10</sup> (2)   | 7432          | 6.5 [5.6-14.9] × 10 <sup>-10</sup> (2)  |
| <i>top1Δ</i>         | 8143          | 7.6 [1.6-56.6] × 10 <sup>-10</sup> (2)   | 8141          | 5.6 [2.5-30.1] × 10 <sup>-10</sup> (3)  |
| <i>top3Δ</i>         | 7442          | 1.5 [1.2-27.0] × 10 <sup>-9</sup> (4)    | 7444          | 1.8 [1.3-6.2] × 10 <sup>-9</sup> (5)    |
| <i>yku70Δ</i>        | 7450          | 8.9 [6.5-16.4] × 10 <sup>-10</sup> (3)   | 7452          | 1.1 [0.8-1.3] × 10 <sup>-9</sup> (3)    |

All strains are isogenic to RDKY7239 (*MATα*, *ura3-52*, *leu2Δ1*, *trp1Δ63*, *his3Δ200*, *lys2ΔBgl*, *hom3-10*, *ade2::hisG*, *ade8*, *hxt13::URA3*). The numbers in parentheses ( ) are the fold increase relative to RDKY7239. Numbers in brackets [ ] represent the 95% confidence intervals.

Table S4. *S. cerevisiae* strains constructed for the present study. All strains in RDKY7239 background.

| RDKY # | Genotype                                                                                       |
|--------|------------------------------------------------------------------------------------------------|
| 3615   | <i>MATa ura3-52 leu2Δ1 trp1Δ63 his3Δ200 lys2ΔBgl hom3-10 ade2::hisG ade8 yel069c::URA3</i>     |
| 7239   | <i>MATalpha ura3-52 leu2Δ1 trp1Δ63 his3Δ200 lys2ΔBgl hom3-10 ade2::hisG ade8 yel069c::URA3</i> |
| 7210   | RDKY7239 <i>asf1::HIS3</i>                                                                     |
| 7501   | RDKY7239 <i>asf1::HIS3 rad51::HPH</i>                                                          |
| 7503   | RDKY7239 <i>asf1::HIS3 rad51::HPH rnh203::KANMX4</i>                                           |
| 7212   | RDKY7239 <i>asf1::HIS3 rnh203::KANMX4</i>                                                      |
| 7214   | RDKY7239 <i>cac1::TRP1</i>                                                                     |
| 7216   | RDKY7239 <i>cac1::TRP1 rnh203::KANMX4</i>                                                      |
| 7218   | RDKY7239 <i>cac2::TRP1</i>                                                                     |
| 7219   | RDKY7239 <i>cac2::TRP1 rnh203::KANMX4</i>                                                      |
| 7221   | RDKY7239 <i>chk1::HIS3</i>                                                                     |
| 7223   | RDKY7239 <i>chk1::HIS3 rnh203::KANMX4</i>                                                      |
| 7225   | RDKY7239 <i>ctf18::TRP1</i>                                                                    |
| 7227   | RDKY7239 <i>ctf18::TRP1 rnh203::KANMX4</i>                                                     |
| 7229   | RDKY7239 <i>ctf4::KANMX4</i>                                                                   |
| 7231   | RDKY7239 <i>ctf4::KANMX4 rnh203::HIS3</i>                                                      |
| 7240   | RDKY7239 <i>dun1::HIS3</i>                                                                     |
| 7242   | RDKY7239 <i>dun1::HIS3 rnh203::KANMX4</i>                                                      |
| 7244   | RDKY7239 <i>esc1::HIS3</i>                                                                     |
| 7245   | RDKY7239 <i>esc1::HIS3 rnh203::KANMX4</i>                                                      |
| 7248   | RDKY7239 <i>esc2::HIS3</i>                                                                     |
| 7507   | RDKY7239 <i>esc2::HIS3 rad51::HPH</i>                                                          |
| 7509   | RDKY7239 <i>esc2::HIS3 rad51::HPH rnh203::KANMX4</i>                                           |
| 7250   | RDKY7239 <i>esc2::HIS3 rnh203::KANMX4</i>                                                      |
| 8145   | RDKY7239 <i>esc2::HIS3 top1::HPH</i>                                                           |
| 8147   | RDKY7239 <i>esc2::HIS3 top1::HPH rnh203::KANMX4</i>                                            |
| 7252   | RDKY7239 <i>esc4::HIS3</i>                                                                     |
| 7254   | RDKY7239 <i>esc4::HIS3 rnh203::KANMX4</i>                                                      |
| 7256   | RDKY7239 <i>exo1::TRP1</i>                                                                     |
| 7258   | RDKY7239 <i>exo1::TRP1 rnh203::KANMX4</i>                                                      |
| 7261   | RDKY7239 <i>hir1::HIS3</i>                                                                     |
| 7263   | RDKY7239 <i>hir1::HIS3 rnh203::KANMX4</i>                                                      |
| 7265   | RDKY7239 <i>hir2::HIS3</i>                                                                     |
| 7267   | RDKY7239 <i>hir2::HIS3 rnh203::KANMX4</i>                                                      |
| 7269   | RDKY7239 <i>hst2::HIS3</i>                                                                     |
| 7271   | RDKY7239 <i>hst2::HIS3 rnh203::KANMX4</i>                                                      |
| 7290   | RDKY7239 <i>lig4::HIS3</i>                                                                     |
| 7292   | RDKY7239 <i>lig4::HIS3 rnh203::KANMX4</i>                                                      |
| 7302   | RDKY7239 <i>mec1::TRP1 sml1::KANMX4</i>                                                        |
| 7304   | RDKY7239 <i>mec1::TRP1 sml1::KANMX4 rnh203::HIS3</i>                                           |
| 7277   | RDKY7239 <i>mec3::HIS3</i>                                                                     |
| 7279   | RDKY7239 <i>mec3::HIS3 rnh203::KANMX4</i>                                                      |
| 7281   | RDKY7239 <i>mgs1::KANMX4</i>                                                                   |
| 7283   | RDKY7239 <i>mgs1::KANMX4 rnh203::HIS3</i>                                                      |
| 7286   | RDKY7239 <i>mph1::KANMX4</i>                                                                   |
| 7511   | RDKY7239 <i>mph1::KANMX4 rad51::HPH</i>                                                        |
| 7513   | RDKY7239 <i>mph1::KANMX4 rad51::HPH rnh203::HIS3</i>                                           |
| 7288   | RDKY7239 <i>mph1::KANMX4 rnh203::HIS3</i>                                                      |
| 7298   | RDKY7239 <i>mrc1::TRP1</i>                                                                     |
| 7300   | RDKY7239 <i>mrc1::TRP1 rnh203::KANMX4</i>                                                      |
| 7273   | RDKY7239 <i>mre11::HIS3</i>                                                                    |
| 7275   | RDKY7239 <i>mre11::HIS3 rnh203::KANMX4</i>                                                     |



|      |                                                        |
|------|--------------------------------------------------------|
| 7294 | RDKY7239 <i>mus81::TRP1</i>                            |
| 7296 | RDKY7239 <i>mus81::TRP1 rnh203::KANMX4</i>             |
| 7312 | RDKY7239 <i>pif1-m2</i>                                |
| 7314 | RDKY7239 <i>pif1-m2 rnh203::KANMX4</i>                 |
| 7318 | RDKY7239 <i>pol30-119::LEU2</i>                        |
| 7316 | RDKY7239 <i>pol30-119::LEU2 rnh203::KANMX4</i>         |
| 7320 | RDKY7239 <i>pol32::TRP1</i>                            |
| 7322 | RDKY7239 <i>pol32::TRP1 rnh203::KANMX4</i>             |
| 7324 | RDKY7239 <i>rad17::HIS3</i>                            |
| 7326 | RDKY7239 <i>rad17::HIS3 rnh203::KANMX4</i>             |
| 7328 | RDKY7239 <i>rad24::HIS3 rnh203::KANMX4</i>             |
| 7330 | RDKY7239 <i>rad24::HIS3 rnh203::KANMX4</i>             |
| 7332 | RDKY7239 <i>rad27::HIS3</i>                            |
| 7334 | RDKY7239 <i>rad27::HIS3 rnh203::KANMX4</i>             |
| 7336 | RDKY7239 <i>rad5::KANMX4</i>                           |
| 7338 | RDKY7239 <i>rad5::KANMX4 rnh203::HIS3</i>              |
| 7340 | RDKY7239 <i>rad50::HIS3</i>                            |
| 7342 | RDKY7239 <i>rad50::HIS3 rnh203::KANMX4</i>             |
| 7344 | RDKY7239 <i>rad51::HIS3</i>                            |
| 7498 | RDKY7239 <i>rad51::HIS3 rad59::TRP1</i>                |
| 7499 | RDKY7239 <i>rad51::HIS3 rad59::TRP1 rnh203::KANMX4</i> |
| 7346 | RDKY7239 <i>rad51::HIS3 rnh203::KANMX4</i>             |
| 7348 | RDKY7239 <i>rad52::HIS3</i>                            |
| 7351 | RDKY7239 <i>rad52::HIS3 rnh203::KANMX4</i>             |
| 7370 | RDKY7239 <i>rad53::HIS3 sml1::TRP1</i>                 |
| 7373 | RDKY7239 <i>rad53::HIS3 sml1::TRP1 rnh203::KANMX4</i>  |
| 7374 | RDKY7239 <i>rad55::TRP1</i>                            |
| 7376 | RDKY7239 <i>rad55::TRP1 rnh203::KANMX4</i>             |
| 7378 | RDKY7239 <i>rad57::HIS3</i>                            |
| 7379 | RDKY7239 <i>rad57::HIS3 rnh203::KANMX4</i>             |
| 7382 | RDKY7239 <i>rad59::TRP1</i>                            |
| 7383 | RDKY7239 <i>rad59::TRP1 rnh203::KANMX4</i>             |
| 7385 | RDKY7239 <i>rad6::HIS3</i>                             |
| 7387 | RDKY7239 <i>rad6::HIS3 rnh203::KANMX4</i>              |
| 7389 | RDKY7239 <i>rad9::HIS3</i>                             |
| 7391 | RDKY7239 <i>rad9::HIS3 rnh203::KANMX4</i>              |
| 7393 | RDKY7239 <i>rdh54::TRP1</i>                            |
| 7395 | RDKY7239 <i>rdh54::TRP1 rnh203::KANMX4</i>             |
| 7397 | RDKY7239 <i>rfa1-t33</i>                               |
| 7399 | RDKY7239 <i>rfa1-t33 rnh203::KANMX4</i>                |
| 7401 | RDKY7239 <i>rfa5-1::TRP1</i>                           |
| 7403 | RDKY7239 <i>rfa5-1::TRP1 rnh203::KANMX4</i>            |
| 7235 | RDKY7239 <i>rnh201::HIS3</i>                           |
| 7237 | RDKY7239 <i>rnh202::TRP1</i>                           |
| 7233 | RDKY7239 <i>rnh203::HIS3</i>                           |
| 7209 | RDKY7239 <i>rnh203::KANMX4</i>                         |
| 7209 | RDKY7239 <i>rnh203::KANMX4</i>                         |
| 7410 | RDKY7239 <i>rrm3::TRP1</i>                             |
| 7412 | RDKY7239 <i>rrm3::TRP1 rnh203::KANMX4</i>              |
| 7414 | RDKY7239 <i>sgs1::HIS3</i>                             |
| 7515 | RDKY7239 <i>sgs1::HIS3 rad51::HPH</i>                  |
| 7517 | RDKY7239 <i>sgs1::HIS3 rad51::HPH rnh203::KANMX4</i>   |
| 7416 | RDKY7239 <i>sgs1::HIS3 rnh203::KANMX4</i>              |
| 8149 | RDKY7239 <i>sgs1::HIS3 top1::HPH</i>                   |
| 8151 | RDKY7239 <i>sgs1::HIS3 top1::HPH rnh203::KANMX4</i>    |
| 7418 | RDKY7239 <i>siz1::TRP1</i>                             |
| 7420 | RDKY7239 <i>siz1::TRP1 rnh203::KANMX4</i>              |
| 7422 | RDKY7239 <i>slx1::KANMX4</i>                           |
| 7424 | RDKY7239 <i>slx1::KANMX4 rnh203::HIS3</i>              |

|      |                                            |
|------|--------------------------------------------|
| 7426 | RDKY7239 <i>slx4::HIS3</i>                 |
| 7428 | RDKY7239 <i>slx4::HIS3 rnh203::KANMX4</i>  |
| 7430 | RDKY7239 <i>srs2::HIS3</i>                 |
| 7432 | RDKY7239 <i>srs2::HIS3 rnh203::KANMX4</i>  |
| 7434 | RDKY7239 <i>tel1::HIS3</i>                 |
| 7436 | RDKY7239 <i>tel1::HIS3 rnh203::KANMX4</i>  |
| 7438 | RDKY7239 <i>tof1::HIS3</i>                 |
| 7440 | RDKY7239 <i>tof1::HIS3 rnh203::KANMX4</i>  |
| 8143 | RDKY7239 <i>top1::HPH</i>                  |
| 8141 | RDKY7239 <i>top1::HPH rnh203::KANMX4</i>   |
| 7442 | RDKY7239 <i>top3::KANMX4</i>               |
| 7445 | RDKY7239 <i>top3::KANMX4 rnh203::HIS3</i>  |
| 7446 | RDKY7239 <i>xrs2::HIS3</i>                 |
| 7448 | RDKY7239 <i>xrs2::HIS3 rnh203::KANMX4</i>  |
| 7450 | RDKY7239 <i>yku70::TRP1</i>                |
| 7452 | RDKY7239 <i>yku70::TRP1 rnh203::KANMX4</i> |
